# Supplementary material for: Genomic and phenotypic stability of fusion-driven pediatric sarcoma cell lines
Source: Springer Nature journal article supplement (doi:10.1038/s41467-024-55340-5), 2025-01-03
Supplement: MOESM2 [file 41467_2024_55340_MOESM2_ESM.pdf › 41467_2024_55340_MOESM2_ESM.pdf]

## **Description of Additional Supplementary Files**

**Supplementary Data 1** | Description of compounds included in the drug screening

**Supplementary Data 2** | ns-SNPs displaying a varying SNP status in EwS cell lines

**Supplementary Data 3** | DMPR in EwS cell lines cultured over 12 months.

**Supplementary Data 4** | DEG in EwS cell lines cultured over 12 months
